# Supplementary material for: Silent Legacy I: Paternal Phthalate Exposure Shifts Androgen–Estrogen Receptor Balance and Induces Transgenerational Reproductive Disruption, Signs of Autism, Feminization and Homosexuality in Mice
Source: Research Square preprint supplement (doi:10.21203/rs.3.rs-8600132/v1), 2026-01-21
Supplement: Supplementary file 1 [file e98413e155e9cfaa662fbdb9.docx]

**Highlights:**

- Phthalate exposure disrupted male sexual behavior across generations.
- Phthalate exposure induces autism-like traits, feminization, homosexuality and circadian disruption.
- DBP induced stronger estrogenic signaling than DEHP, while also suppressing androgenic pathways.
- ERα upregulation was associated with feminized behaviors.
- Androgen signaling reduction was associated with decreased sexual motivation and altered copulatory timing.
- Parental exposure amplified transgenerational effects.
